# Supplementary material for: PKA regulatory IIα subunit is essential for PGD2-mediated resolution of inflammation
Source: PubMed Central journal article supplement — J Exp Med. 2016 Sep 19;213(10):2209–26. doi: 10.1084/jem.20160459 (PMC5030806; doi:10.1084/jem.20160459), 2016-09-19
Supplement: JEM_20160459_sm.pdf [file JEM_20160459_sm.pdf]

SUPPLEMENTAL MATERIAL

Kong et al., <http://www.jem.org/cgi/content/full/jem.20160459/DC1>

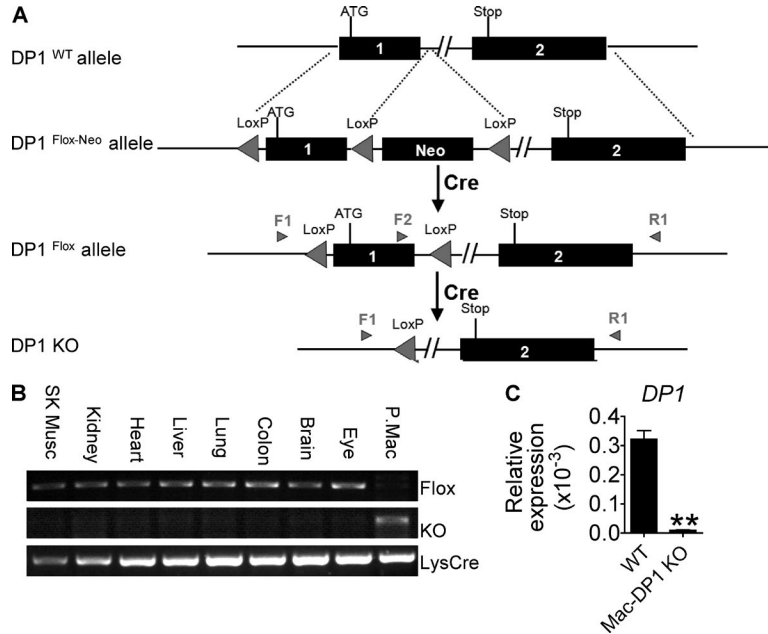

Figure S1. **Generation and characterization of myeloid cell-specific DP1-deficient mice.** (A) Schematic of the intact DP1<sup>WT</sup>, DP1<sup>flox-neo</sup> allele, DP1<sup>flox</sup> allele, and DP1 KO allele. Fixed boxes indicate coding exons; dashed lines represent regions for homologous recombination; gray triangles indicate primers for genotyping. neo, neomycin cassette. (B) PCR analysis on genomic DNA derived from various organs of DP1<sup>flox/flox</sup>Lys<sup>Cre</sup> mice (Mac-DP1 KO). P.mac, peritoneal macrophage; SK Musc, skeletal muscle. (C) DP1 mRNA levels in macrophages from DP1<sup>flox/flox</sup>Lys<sup>Cre</sup> (Mac-DP1 KO) and DP1<sup>flox/flox</sup> (WT) mice. \*\*, P < 0.01 versus WT. n = 6. Data are presented as mean ± SEM. Statistical analysis was performed using unpaired Student's *t* tests. The PCR analysis was repeated three times.

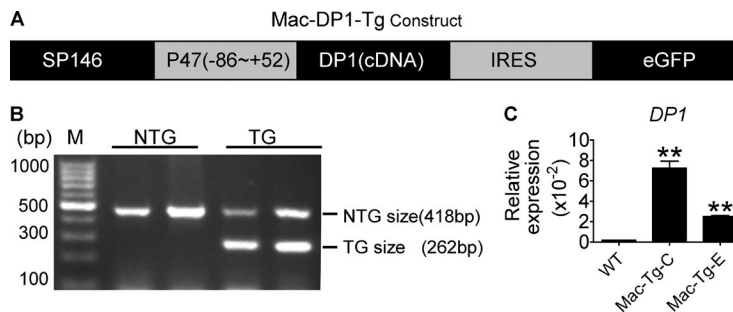

Figure S2. **Generation of Mac-DP1-Tg mice.** (A) Mac-DP1-Tg construct. SP146: Synthetic promoter elements of clone 146; p47:138 bp of the p47phox promoter was used as the minipromoter for promoter synthesis and as a comparator for promoter selection. eGFP, enhanced GFP; IRES, internal ribosomal entry site. (B) Genotyping of Mac-DP1-Tg mice. M, marker; NTG, nontransgenic mice. (C) DP1 expression levels in macrophages from Mac-DP1-Tg mice. \*\*, P < 0.01 versus WT. n = 4–6. Data are presented as mean ± SEM. Statistical analysis was performed using unpaired Student's *t* tests. The PCR analysis was repeated three times.

Table S1. Primers for RT-PCR analysis in mice

| Gene                           | Sense (5'-3')             | Anti-sense (5'-3')      |
|--------------------------------|---------------------------|-------------------------|
| <i>COX-1</i>                   | GATTGTACTCGCACGGGCTAC     | GGATAAGGTTGGACCGCACT    |
| <i>COX-2</i>                   | TGTGACTGTACCCGGACTGG      | TGCACATTGTAAGTAGGTGGAC  |
| <i>H-PGDS</i>                  | GGAAAGACCCGAAATTATTGCT    | ACCACTGCATCAGCTTGACAT   |
| <i>L-PGDS</i>                  | TGCAGCCCAACTTTCAACAAG     | TGGTCTCACACTGGTTTTTCCT  |
| <i>DP1</i>                     | AACCTCTATGACATGCACAGGCG   | AAGGCTTGGAGGCTTCTGAGTC  |
| <i>DP2</i>                     | TCTCAACCAATCAGCACACCCGA   | GATGTAGCGGAGGCTAGAGTTGC |
| <i>IL-1<math>\beta</math></i>  | AGCTCTCCACCTCAATGGAC      | GACAGGCTTGTGCTCTGCTT    |
| <i>IL-12<math>\beta</math></i> | TGGTTTGCCATCGTTTTGCTG     | ACAGGTGAGGTTCACTGTTTCT  |
| <i>TNF<math>\alpha</math></i>  | ACGGCATGGATCTCAAGAC       | CGGACTCCGCAAGTCTAAG     |
| <i>MCP1</i>                    | TTAAAAACCTGGATCGGAACAA    | GCATTAGCTTACAGTTACGGGT  |
| <i>NOS2</i>                    | ACATCGACCCGTCCACAGTAT     | CAGAGGGTAGGCTTGTCTC     |
| <i>YM1</i>                     | CAGGTCTGGCAATCTTCTGAA     | GTCTTGCTCATGTGTGAAGTGA  |
| <i>Arg1</i>                    | CTCCAAGCCAAAGTCCTTAGAG    | AGGAGCTGTCATTAGGGACATC  |
| <i>MRC1</i>                    | CTCTGTTCACTATTGGACGC      | CGGAATTTCTGGATTACAGCTTC |
| <i>Dectin</i>                  | GACTTCAGCACTCAAGACATCC    | TTGTGTCGCCAAAATGCTAGG   |
| <i>Prkar1a</i>                 | ATGGCGTCTGGCAGTATGG       | GCTGCACGATGGAGTCCTTC    |
| <i>Prkar1b</i>                 | TCTGAAAGGATGGCAGATGTACG   | CTGGGAGTTGACTTCTGCCG    |
| <i>Prkar2a</i>                 | GAGGAGGATAACGATCCAAGGG    | TGCTCGTCAGTTTTGACAATCTT |
| <i>Prkar2b</i>                 | CCAGTAAGGGTGTCAACTTCG     | GGACTCTGCATCGTCTTCTC    |
| <i>L32</i>                     | TTAAGCGAAACTGGCGGAAAC     | TTGTTGCTCCCATACCCGATG   |
| <i>GAPDH</i>                   | CCCTTATTGACCTCAACTACATGGT | GAGGGGCCATCCACAGTCTTCTG |

*L-PGDS*, lipocalin *PGDS*.
